# Supplementary material
Source: publisher figshare collection journal article supplement (https://tandf.figshare.com/ndownloader/files/23185493)
Supplement: Supplementary file 1 [file 23185493]

**Supplementary Table 1: Univariate regression analysis of relationships with involvement and attendance**

| Variable (Barrier vs. Not a barrier)                                 | <i>B</i>                         | 95% CI         | <i>p</i> | <i>B</i>                        | 95% CI         | <i>p</i> |
|----------------------------------------------------------------------|----------------------------------|----------------|----------|---------------------------------|----------------|----------|
|                                                                      | Dependent Variable = Involvement |                |          | Dependent Variable = Attendance |                |          |
| Disorders of initiating and maintaining sleep<br>(T > 70 vs. T < 70) | -0.23                            | [-0.62, 0.17]  | 0.252    |                                 |                |          |
| Sleep breathing disorders (T > 70 vs. T < 70)                        | -0.35                            | [-0.73, 0.04]  | 0.076    |                                 |                |          |
| Disorders of excessive somnolence<br>(T > 70 vs. T < 70)             | -0.24                            | [-0.75, 0.26]  | 0.344    |                                 |                |          |
| Child challenging behaviour (>30 vs. <30)                            | -0.18                            | [-0.56, 0.21]  | 0.366    |                                 |                |          |
| Doctor's appointments in the past 12m<br>(<4 vs. ≥4)                 | 0.02                             | [-0.39, 0.43]  | 0.935    |                                 |                |          |
| Verbal communication<br>(No speech/Difficulty vs. Speaks well)       | -0.63                            | [-0.98, -0.29] | <0.001   |                                 |                |          |
| Frequency of Attendance<br>(per point increase / 7 points)           | 0.35                             | [0.16, 0.53]   | <0.001   |                                 |                |          |
| Mood (Distressed vs. Well)                                           |                                  |                |          | -0.53                           | [-0.92, -0.13] | 0.010    |
| Availability of Time<br>(per point increase / 5 points)              |                                  |                |          | 0.35                            | [0.11, 0.59]   | 0.004    |
| Availability of Transportation<br>(Adequate vs. Not always adequate) |                                  |                |          | -0.20                           | [-0.63, 0.22]  | 0.345    |
| NDIS plan (Plan vs. No plan)                                         |                                  |                |          | -0.09                           | [-0.50, 0.31]  | 0.646    |
| Variable (Barrier vs. Not a barrier)                                 |                                  |                |          |                                 |                |          |
| Physical layout                                                      |                                  |                |          | -0.25                           | [-0.68, 0.17]  | 0.233    |
| Sensory qualities of settings                                        |                                  |                |          | -0.32                           | [-0.73, 0.08]  | 0.117    |
| Relationships with peers                                             |                                  |                |          | -0.06                           | [-0.46, 0.34]  | 0.765    |
| Attitudes/actions of others toward child                             |                                  |                |          | -0.07                           | [-0.48, 0.33]  | 0.717    |

|                            |       |                |       |
|----------------------------|-------|----------------|-------|
| Outside weather conditions | -0.23 | [-0.63, 0.17]  | 0.259 |
| Safety of community        | -0.25 | [-0.65, 0.14]  | 0.208 |
| Programs and Services      | -0.59 | [-0.98, -0.20] | 0.003 |
| Information                | -0.41 | [-0.81, -0.01] | 0.045 |
| Equipment or supplies      | -0.38 | [-0.79, 0.23]  | 0.064 |

For Peer Review
